# Supplementary material for: Design, Synthesis, and Biological Evaluation of Novel Tetrahydroacridin Hybrids with Sulfur-Inserted Linkers as Potential Multitarget Agents for Alzheimer’s Disease
Source: MDPI journal article supplement (doi:10.3390/molecules29081782), 2024-04-14

## Supporting Information

### **Design, Synthesis and Biological Evaluation of Novel Tetrahydroacridin Hybrids with Sulfur-inserted Linkers as Potential Multitarget Agents for Alzheimer's Disease**

Xiuyuan Wu<sup>1,†</sup>, Xiaotong Ze<sup>1,†</sup>, Shuai Qin<sup>1</sup>, Beiyu Zhang<sup>3</sup>, Xinnan Li<sup>1</sup>, Qi Gong<sup>2</sup>, Haiyan Zhang<sup>2,\*</sup>, Zheyang Zhu<sup>3,\*</sup> and Jinyi Xu<sup>1,\*</sup>

<sup>1</sup> State Key Laboratory of Natural Medicines and Department of Medicinal Chemistry, China Pharmaceutical University, 24 Tong Jia Xiang, Nanjing 210009, P. R. China.

<sup>2</sup> CAS Key Laboratory of Receptor Research, Shanghai Institute of Materia Medica, Chinese Academy of Sciences, 555 Zu Chong Zhi Road, Shanghai 201203, China.

<sup>3</sup> Therapeutics & Formulation, School of Pharmacy, The University of Nottingham, University Park Campus, Nottingham NG7 2RD, UK.

\* E-mails: jinyixu@china.com; hzhang@simmm.ac.cn; Zheyang.Zhu@nottingham.ac.uk

<sup>†</sup> *These authors contributed equally to this work.*

## Table of contents

|                                           |     |
|-------------------------------------------|-----|
| NMR and HRMS of compound <b>16a</b> ..... | S2  |
| NMR and HRMS of compound <b>16b</b> ..... | S4  |
| NMR and HRMS of compound <b>16c</b> ..... | S6  |
| NMR and HRMS of compound <b>16d</b> ..... | S8  |
| NMR and HRMS of compound <b>16e</b> ..... | S10 |
| NMR and HRMS of compound <b>16f</b> ..... | S12 |
| NMR and HRMS of compound <b>18a</b> ..... | S14 |
| NMR and HRMS of compound <b>18b</b> ..... | S16 |
| NMR and HRMS of compound <b>18c</b> ..... | S18 |

Cc1c(C(=O)c2cc(C#N)cc2SCCNC3=C(Cl)C=CC4=C3C=CC5=C4CCCCC5)c(C#N)cc1

Chemical structure of compound 10 is shown above the  $^1\text{H}$  NMR spectrum. The spectrum was recorded in  $\text{CDCl}_3$  and shows the following chemical shifts (ppm): 8.70, 8.66, 7.86, 7.86, 7.83, 7.80, 7.65, 7.64, 7.26 ( $\text{CDCl}_3$ ), 7.21, 7.20, 7.18, 7.17, 6.70, 4.36, 3.93, 3.91, 3.89, 3.87, 3.61, 3.59, 3.57, 3.55, 3.01, 2.99, 2.97, 2.65, 2.63, 2.62, 1.84, 1.82.

Integration values are provided below the baseline: 2.18, 2.20, 2.17, 1.01, 1.00, 0.98, 2.22, 2.14, 3.01, 2.19, 2.22, 4.18.

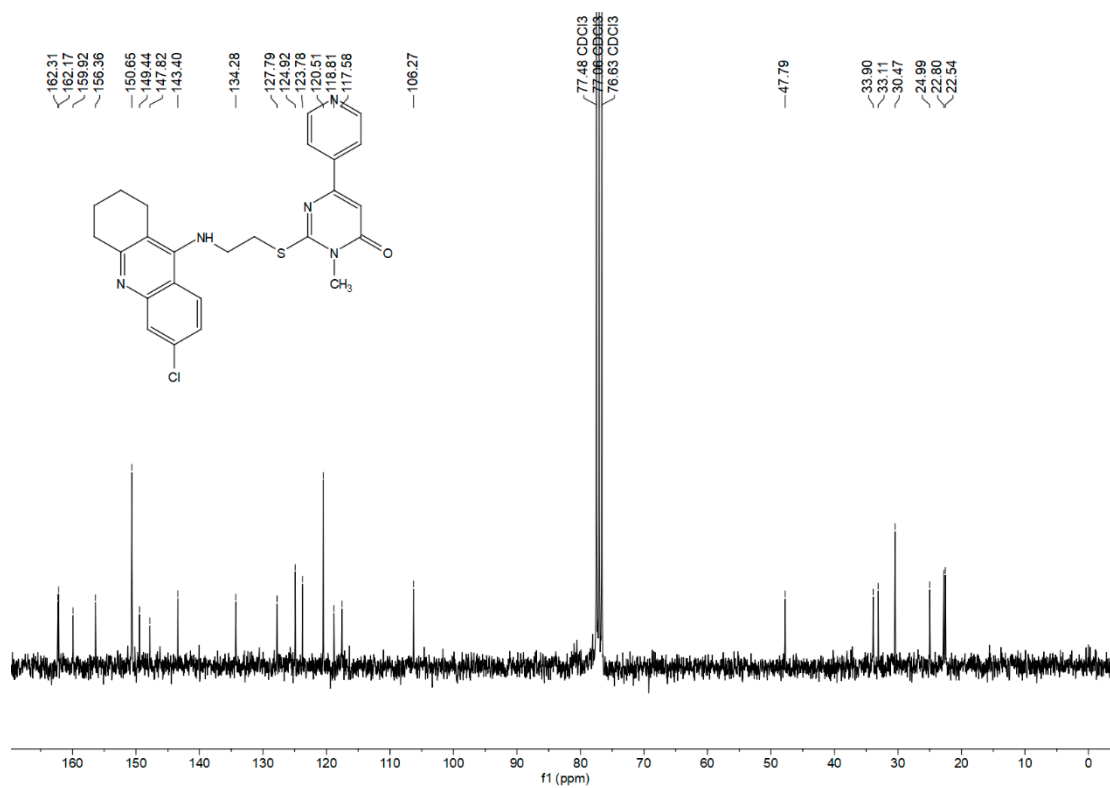

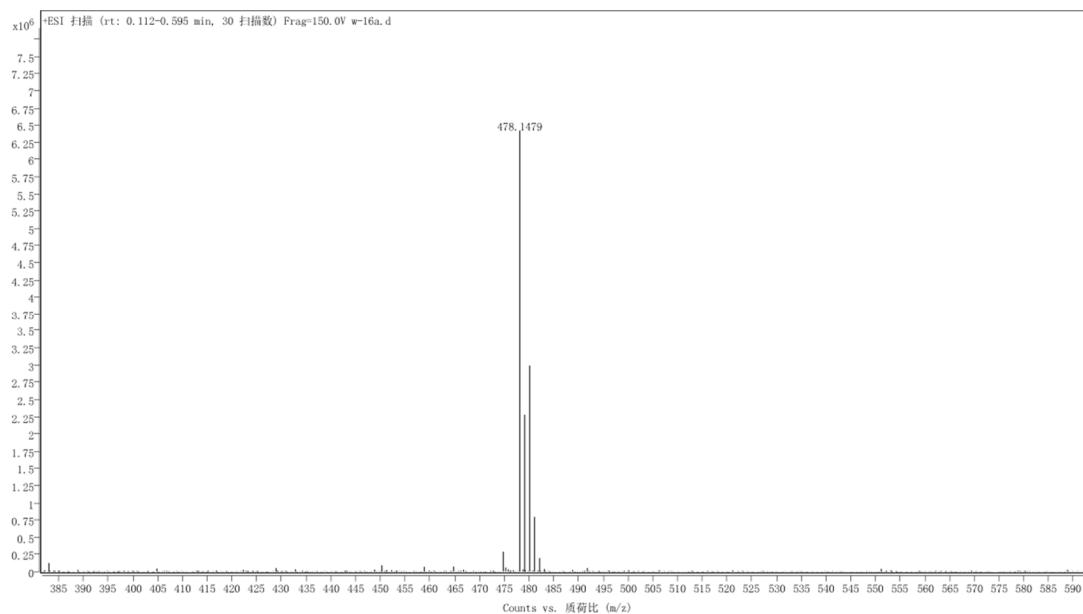

NMR and HRMS of compound **16b**

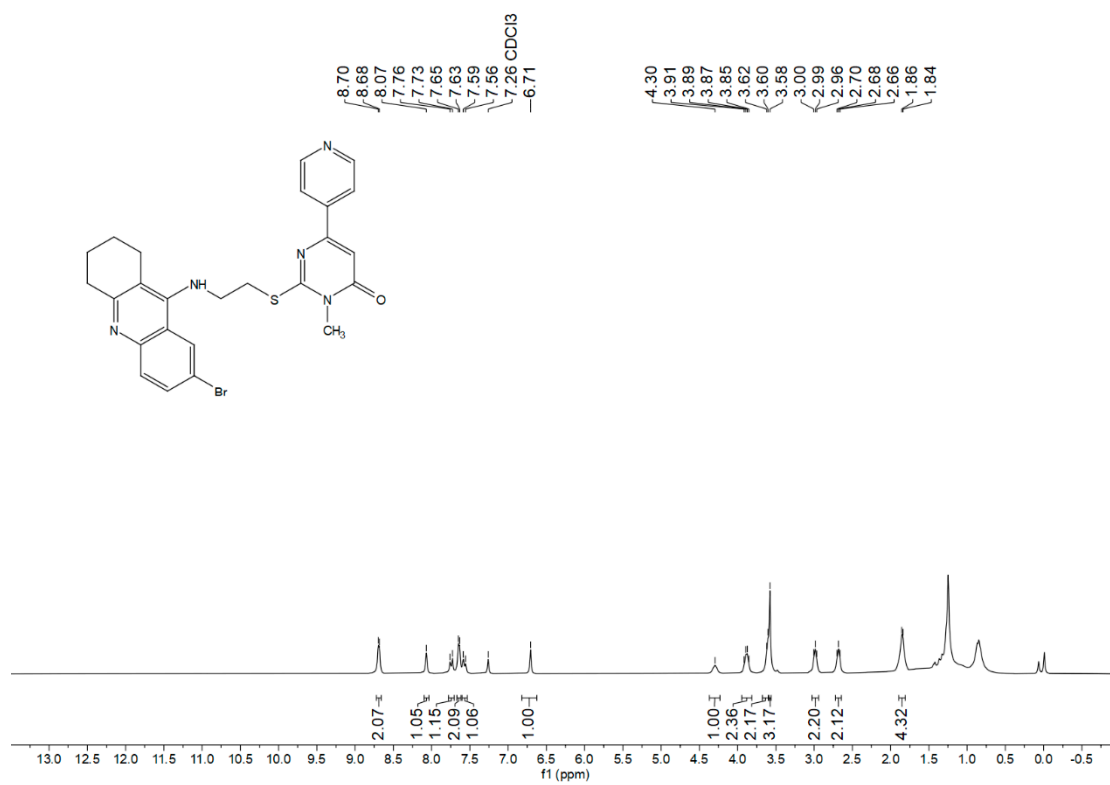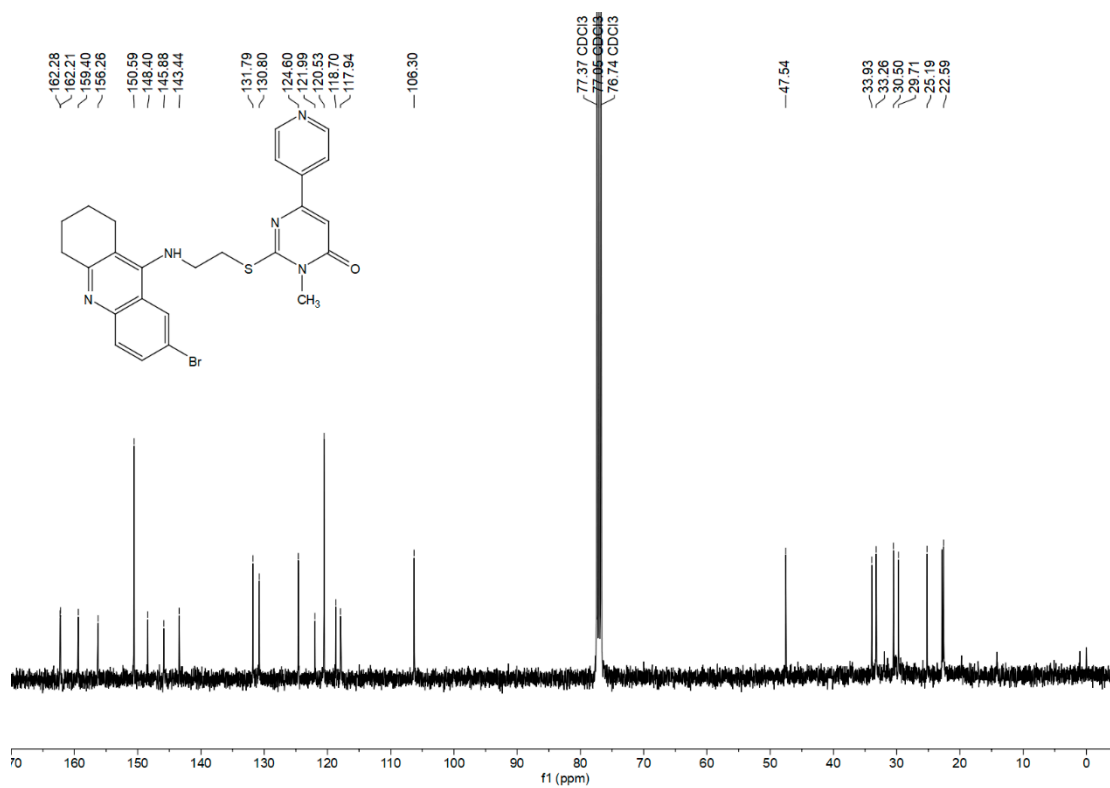

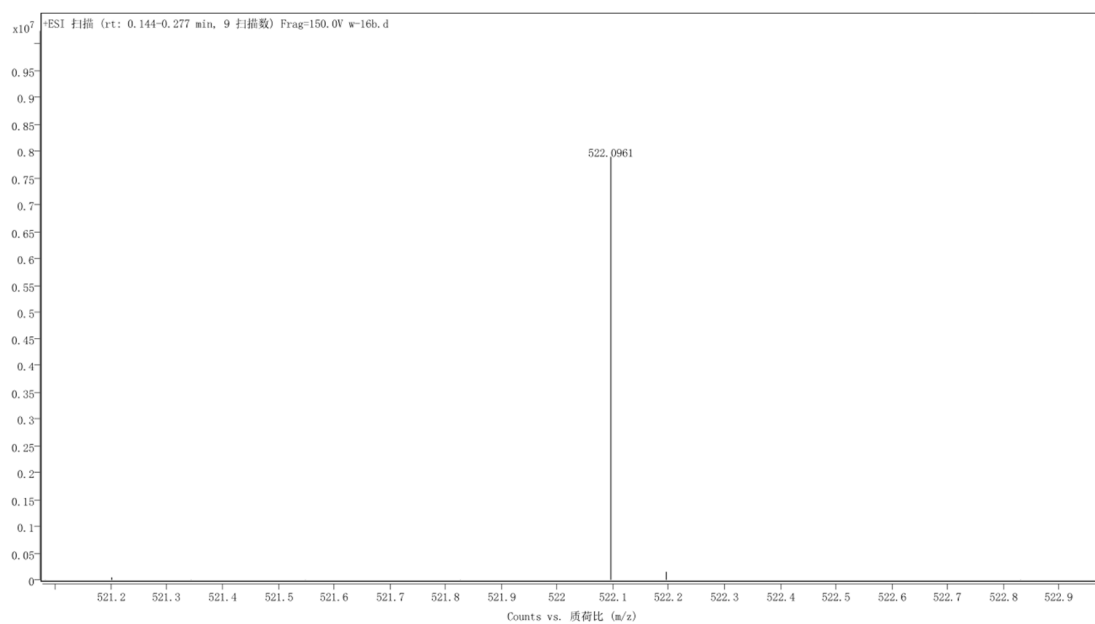

NMR and HRMS of compound **16c**

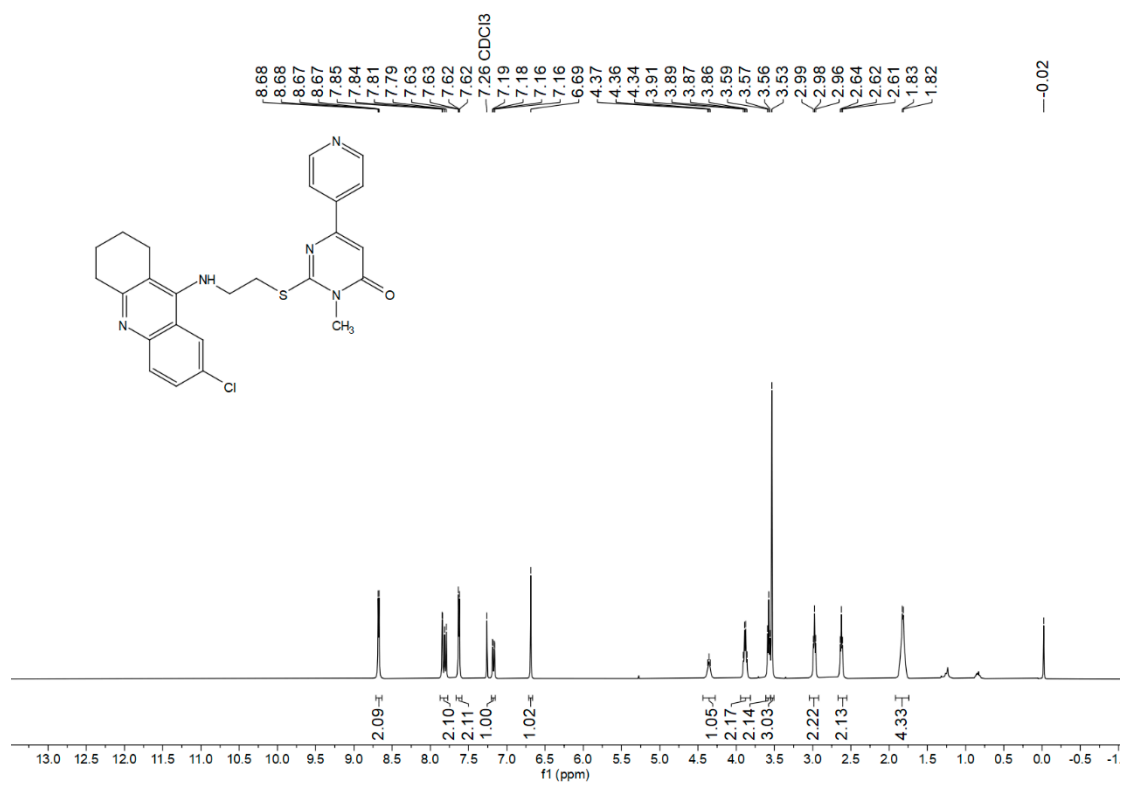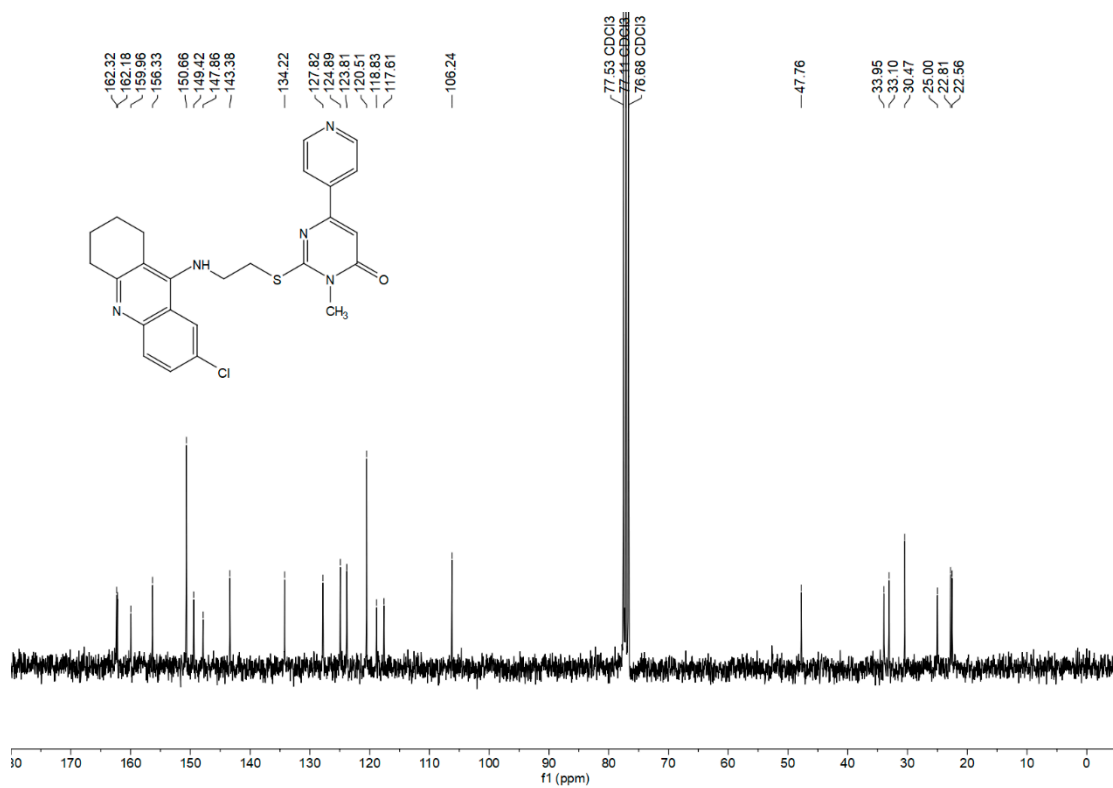

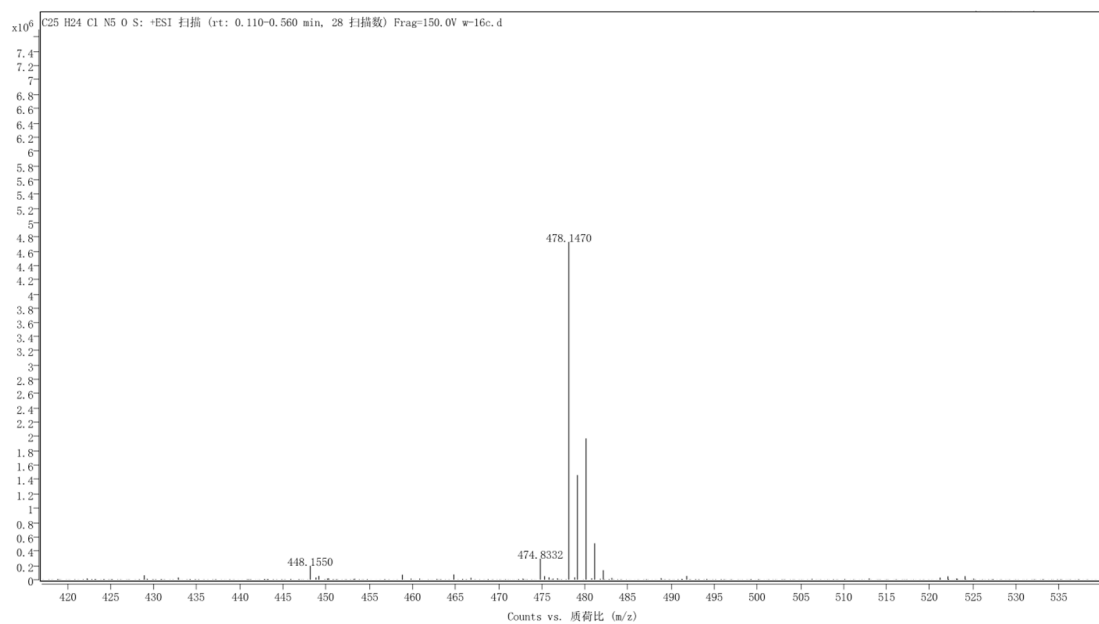



NMR and HRMS of compound **16d**

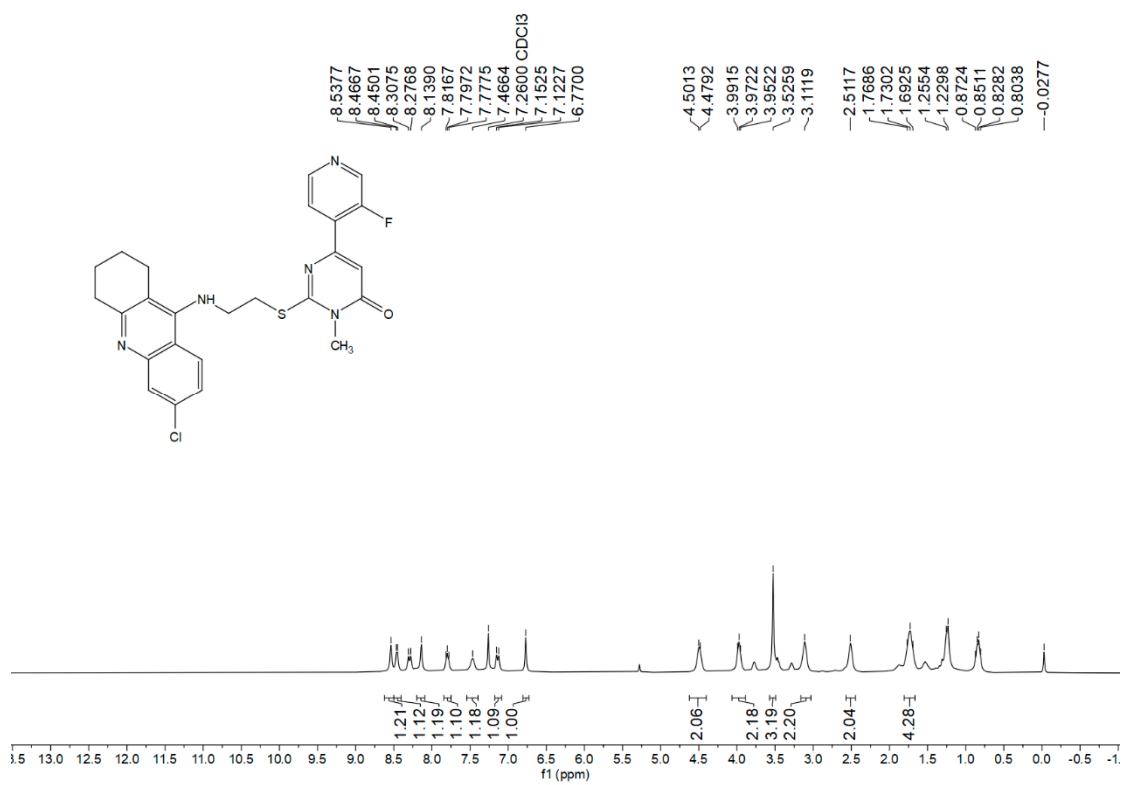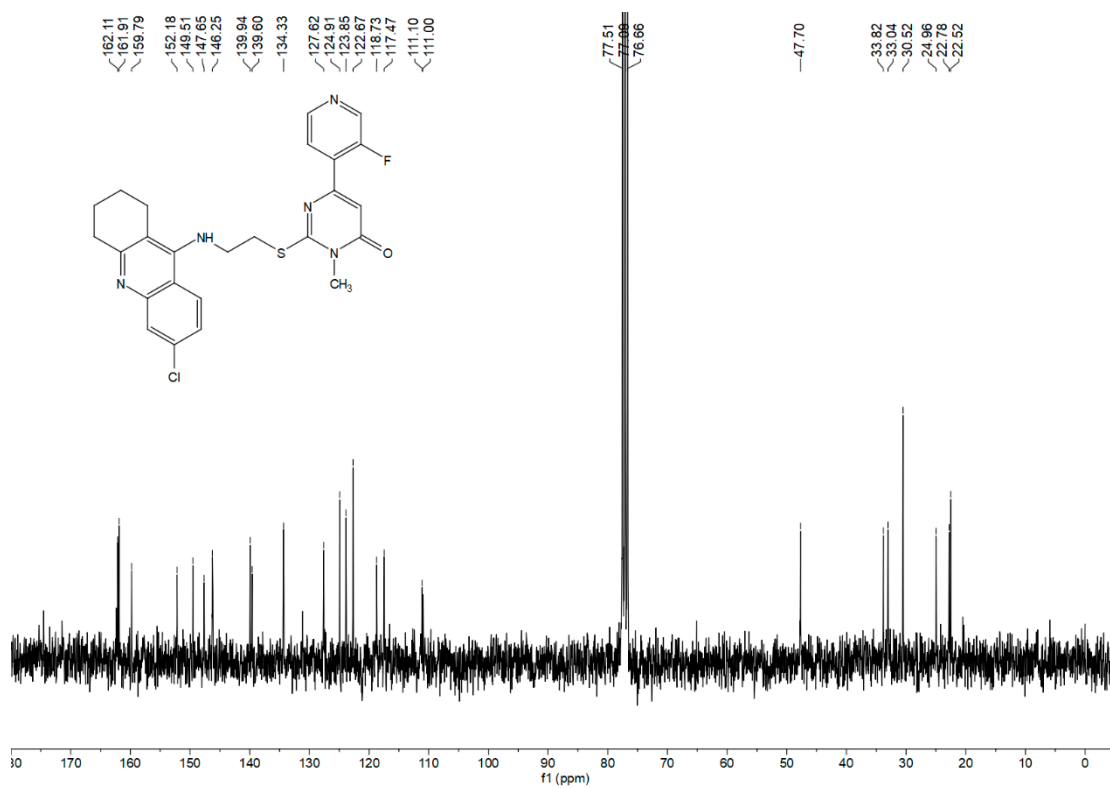

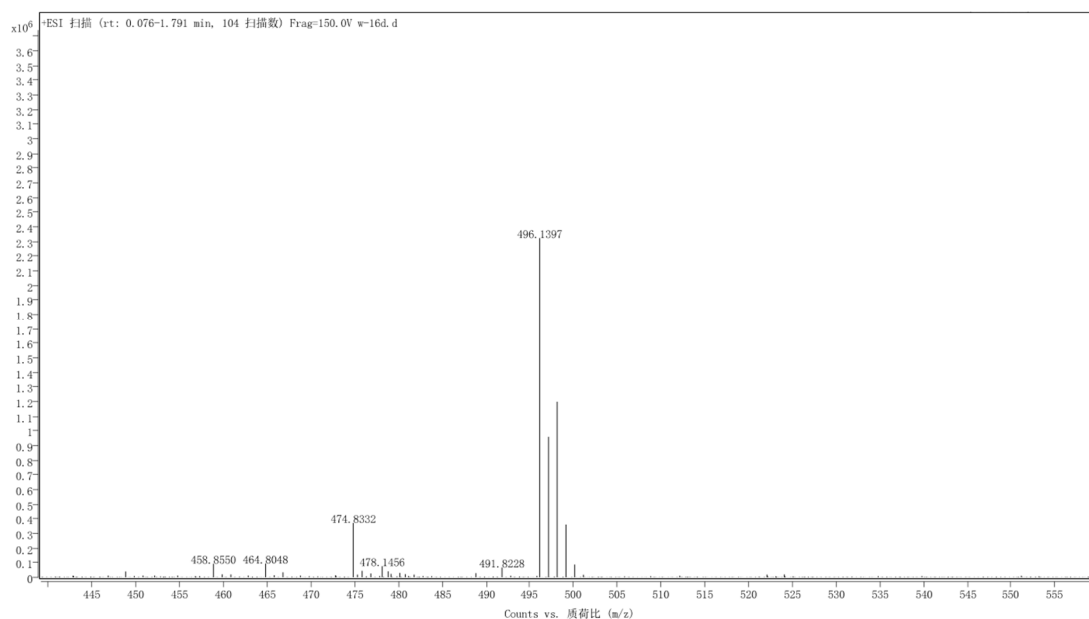

NMR and HRMS of compound **16e**

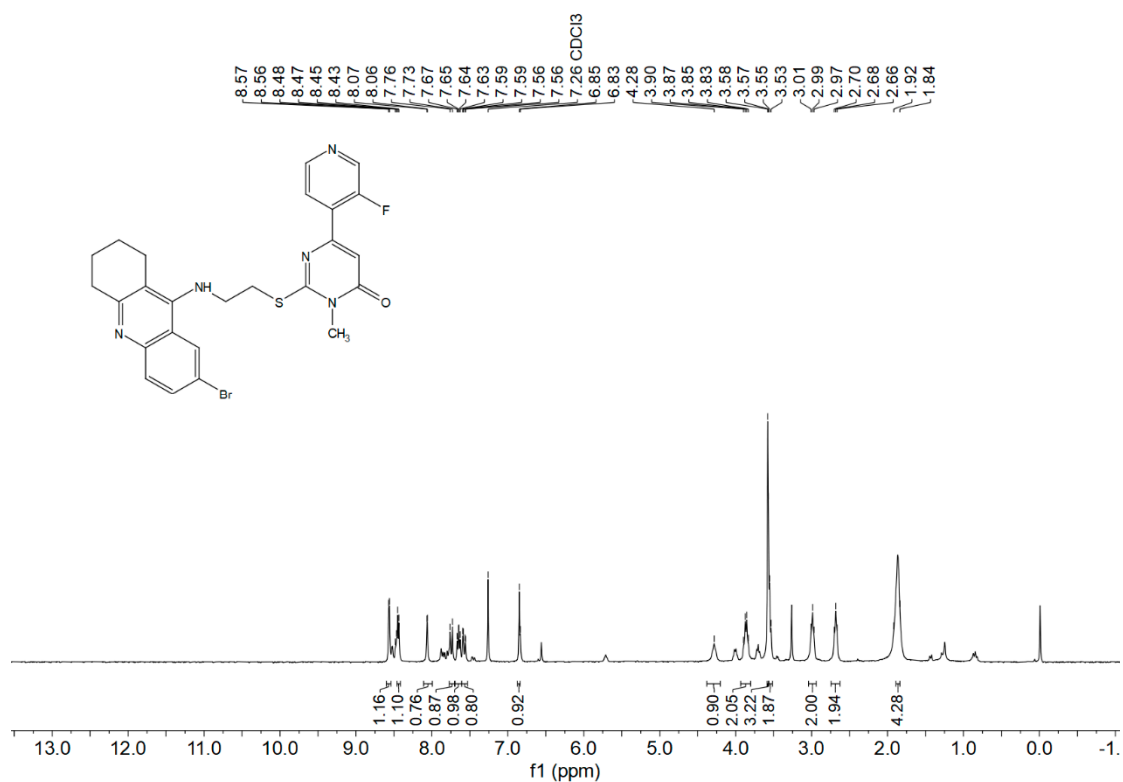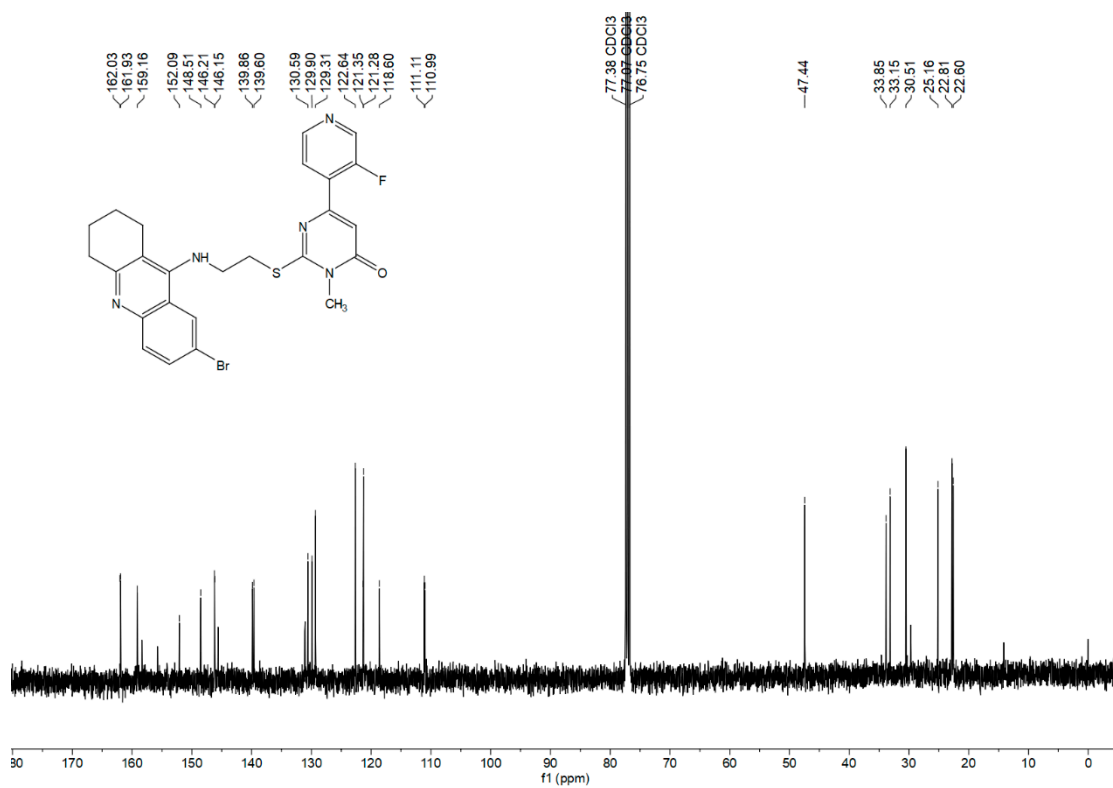

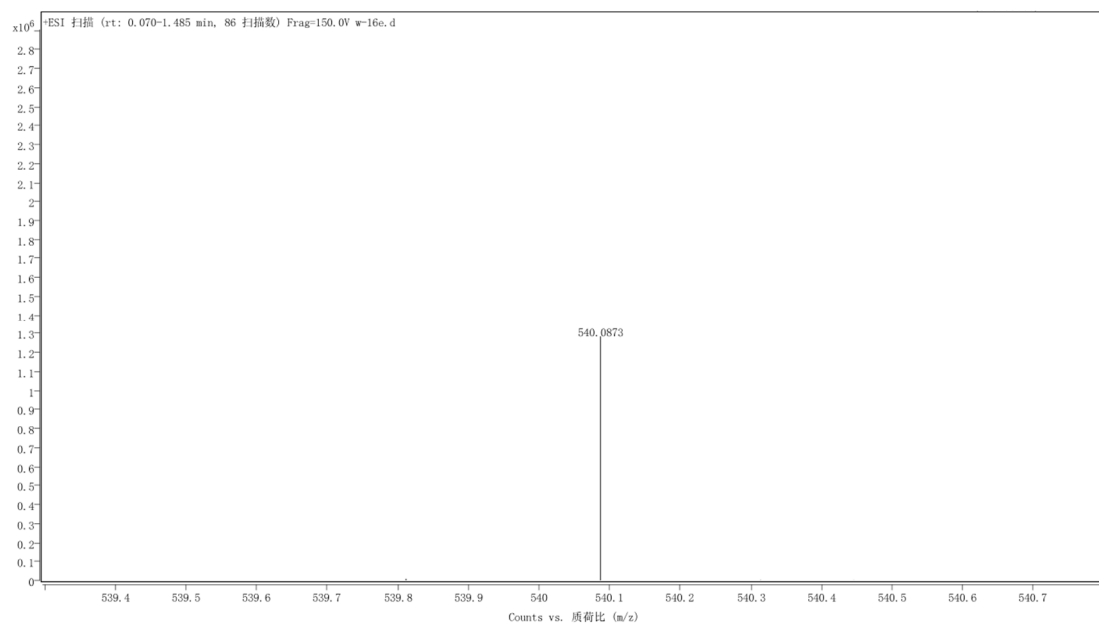

NMR and HRMS of compound **16f**

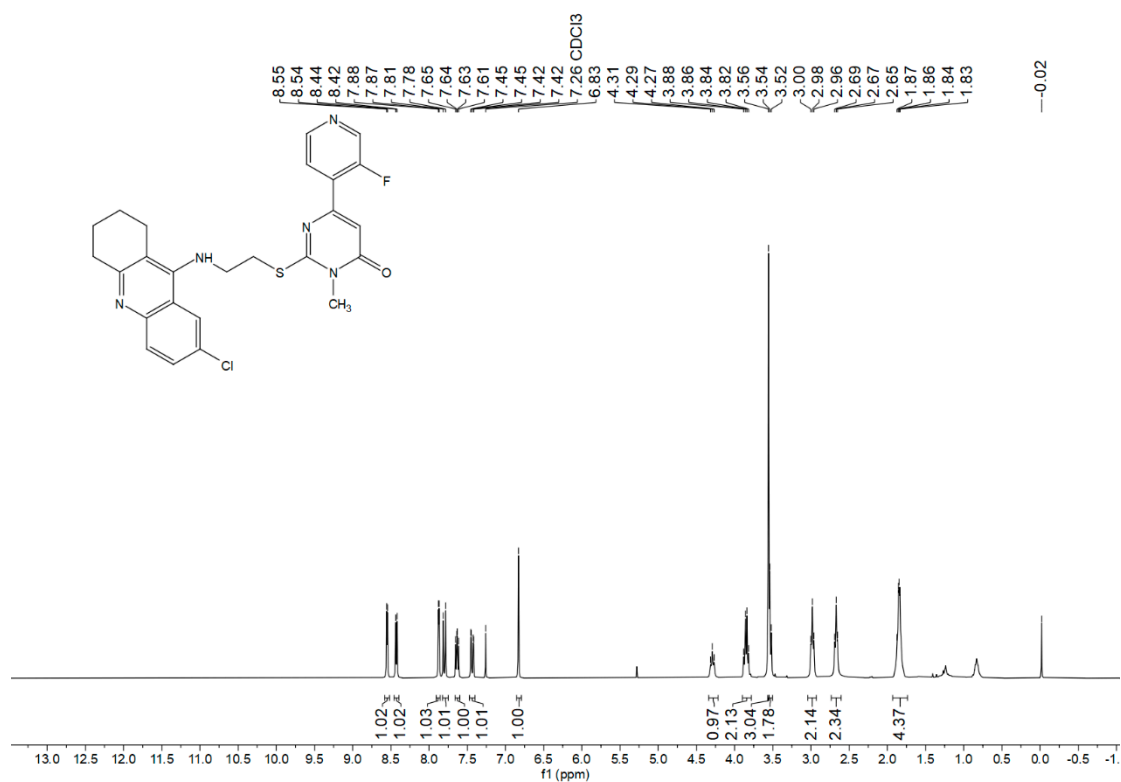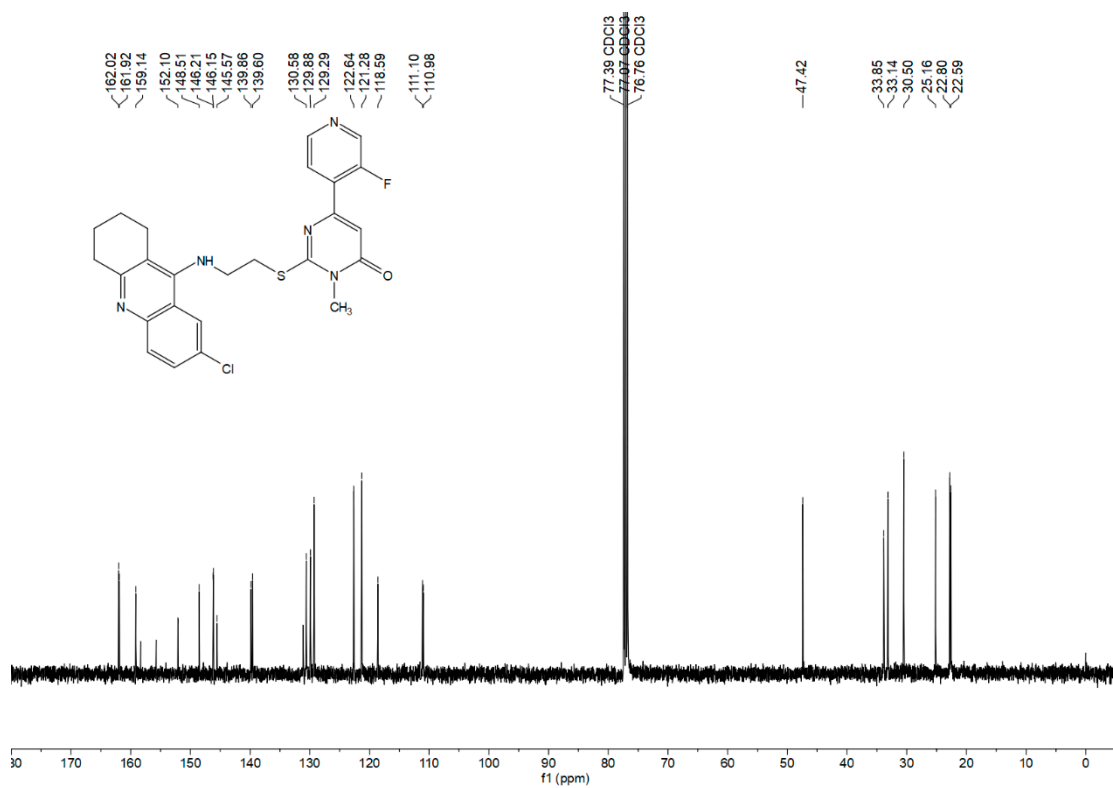

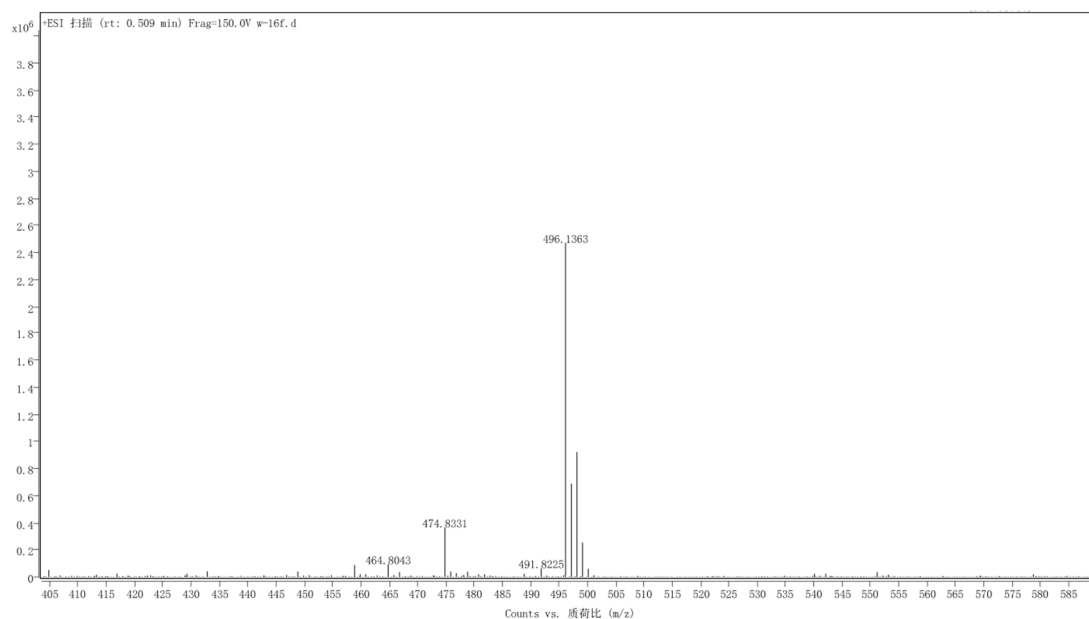

NMR and HRMS of compound **18a**

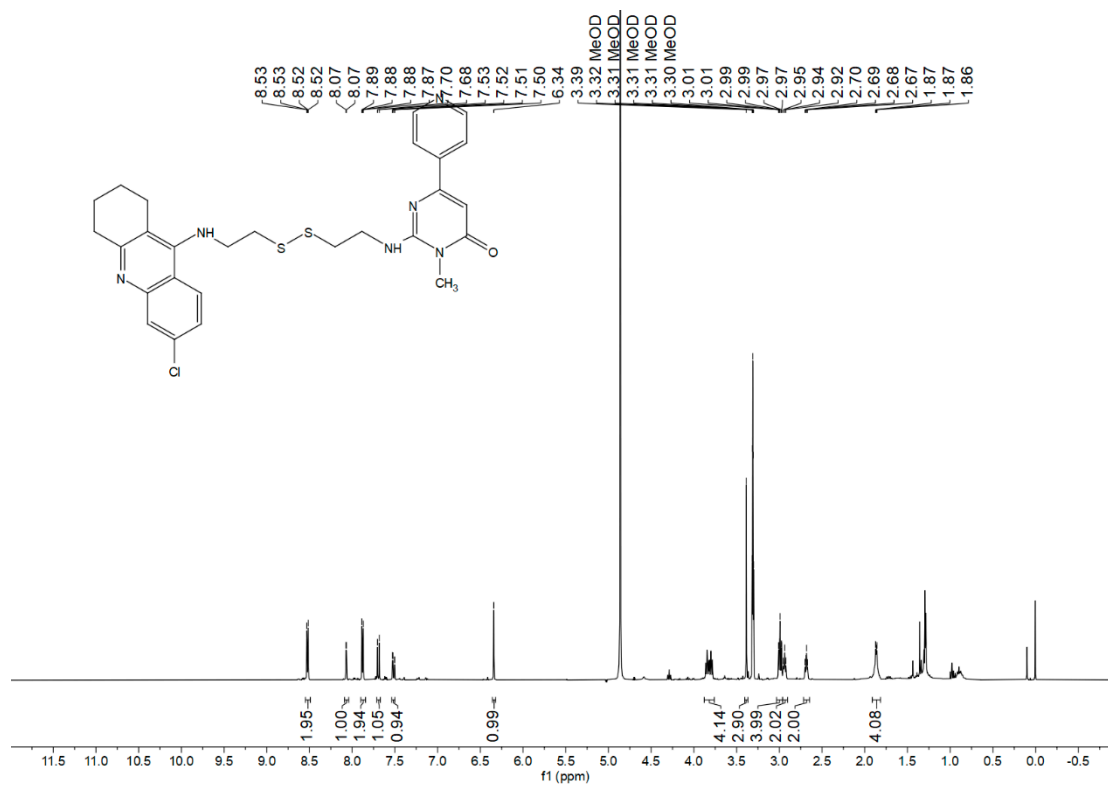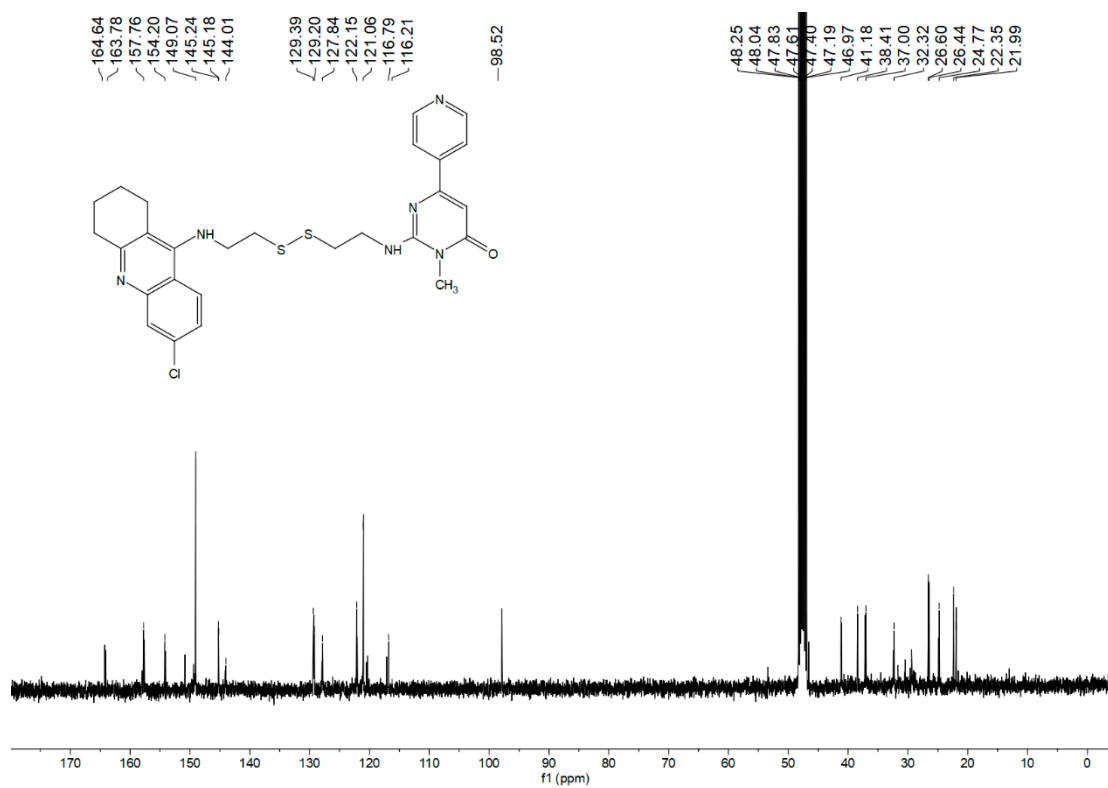

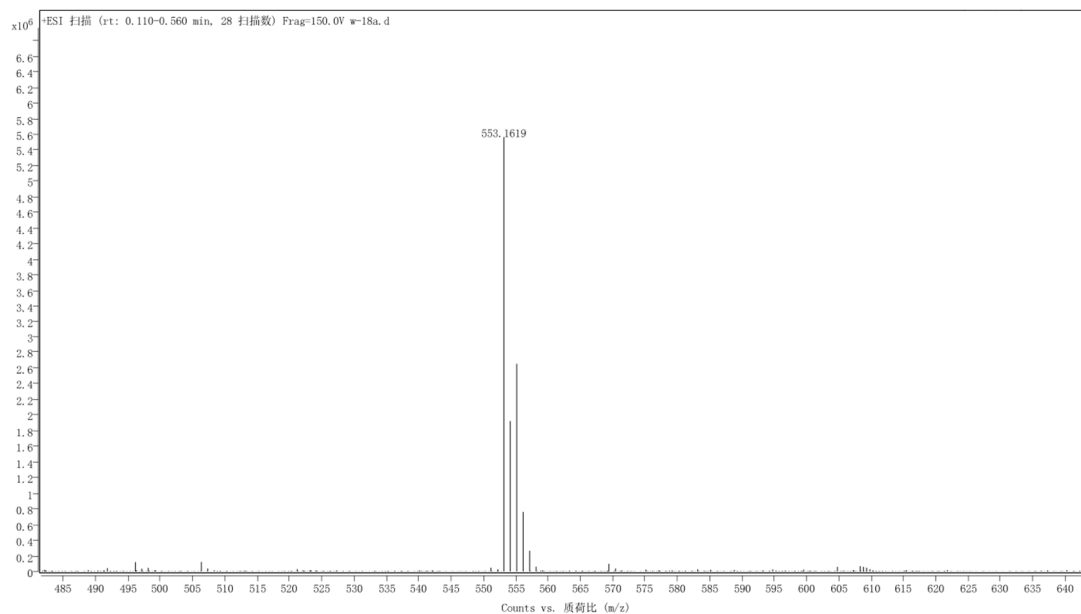



NMR and HRMS of compound **18b**

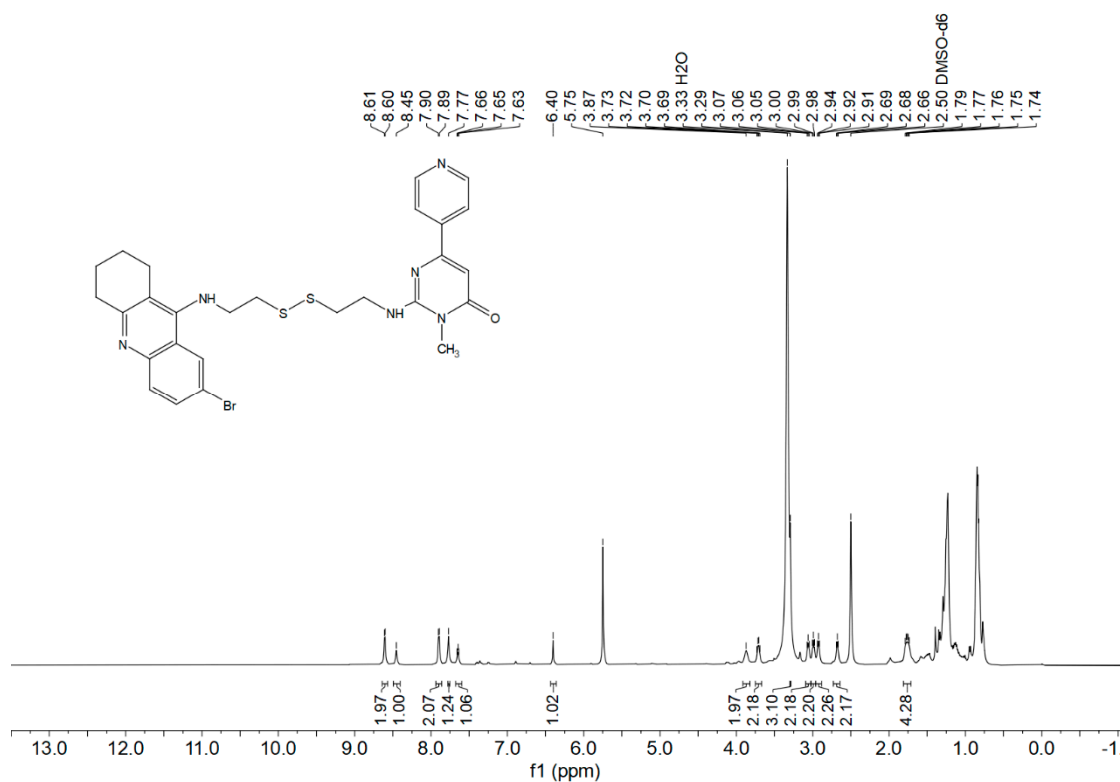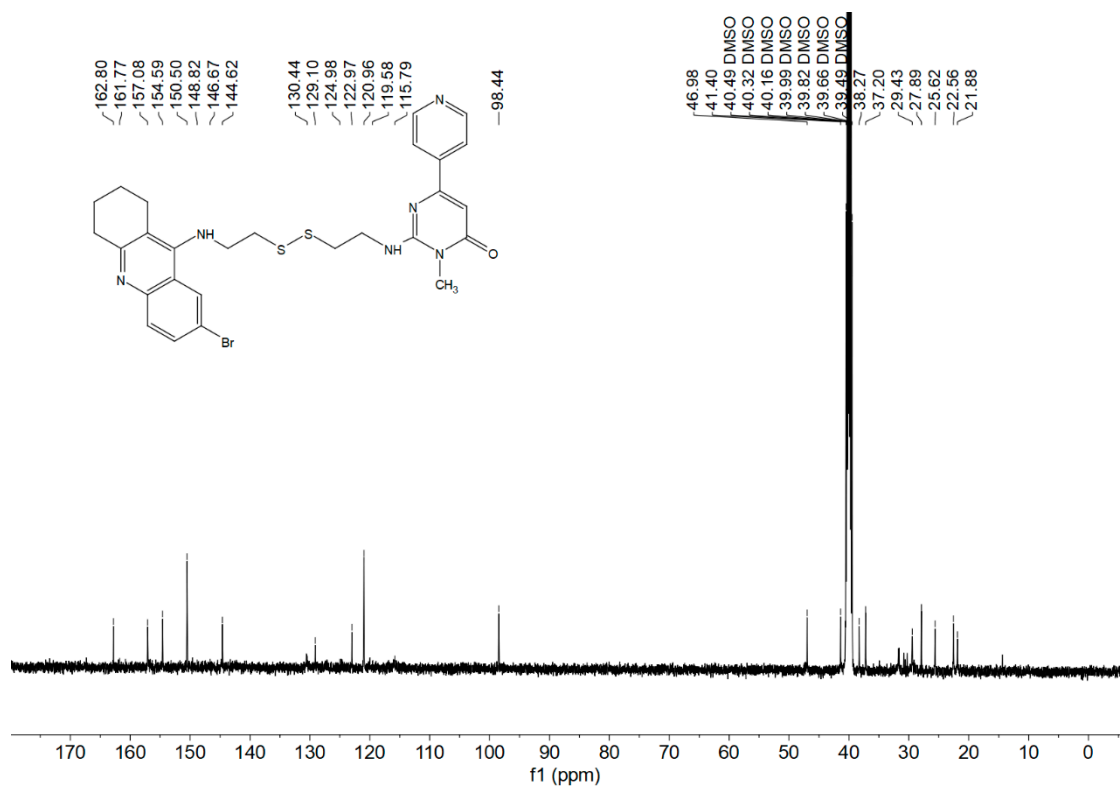

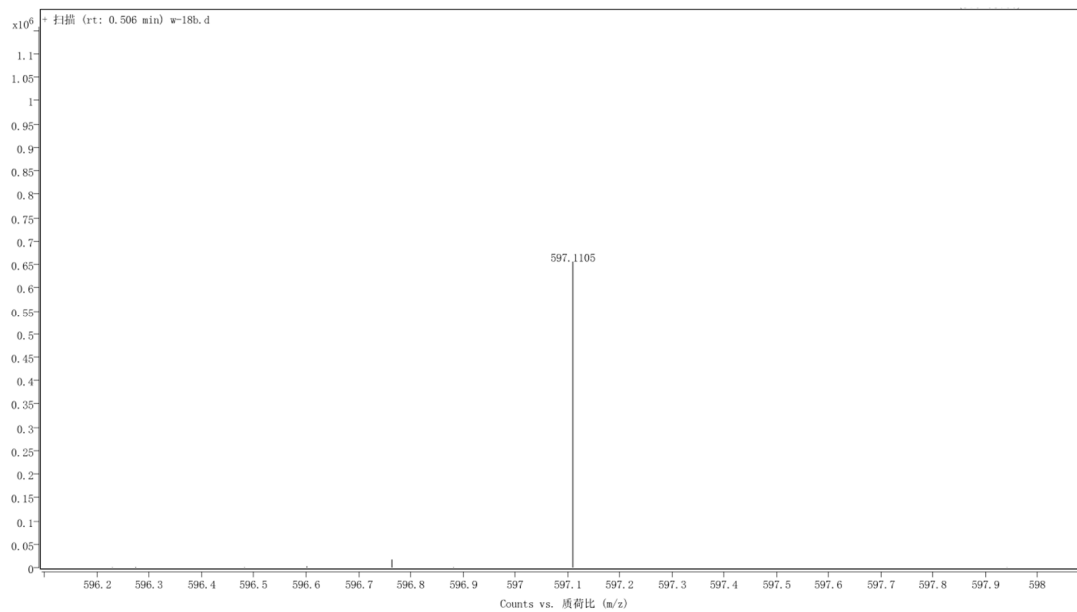

NMR and HRMS of compound **18c**

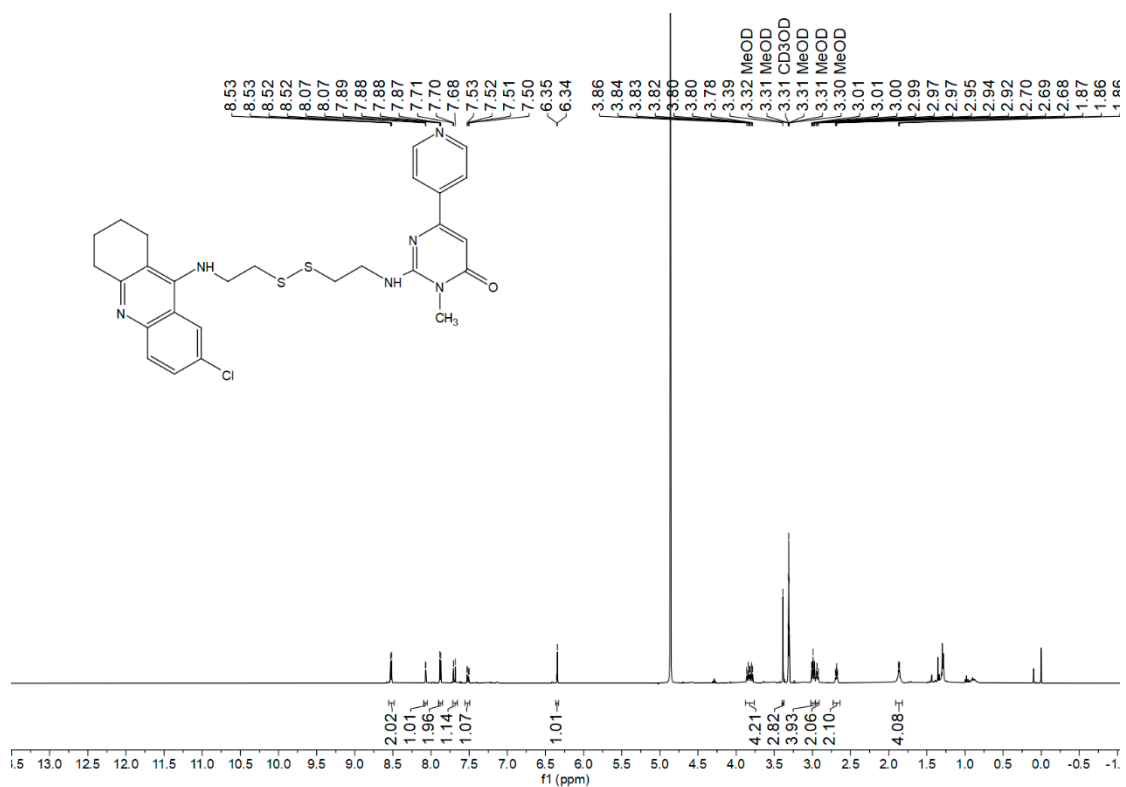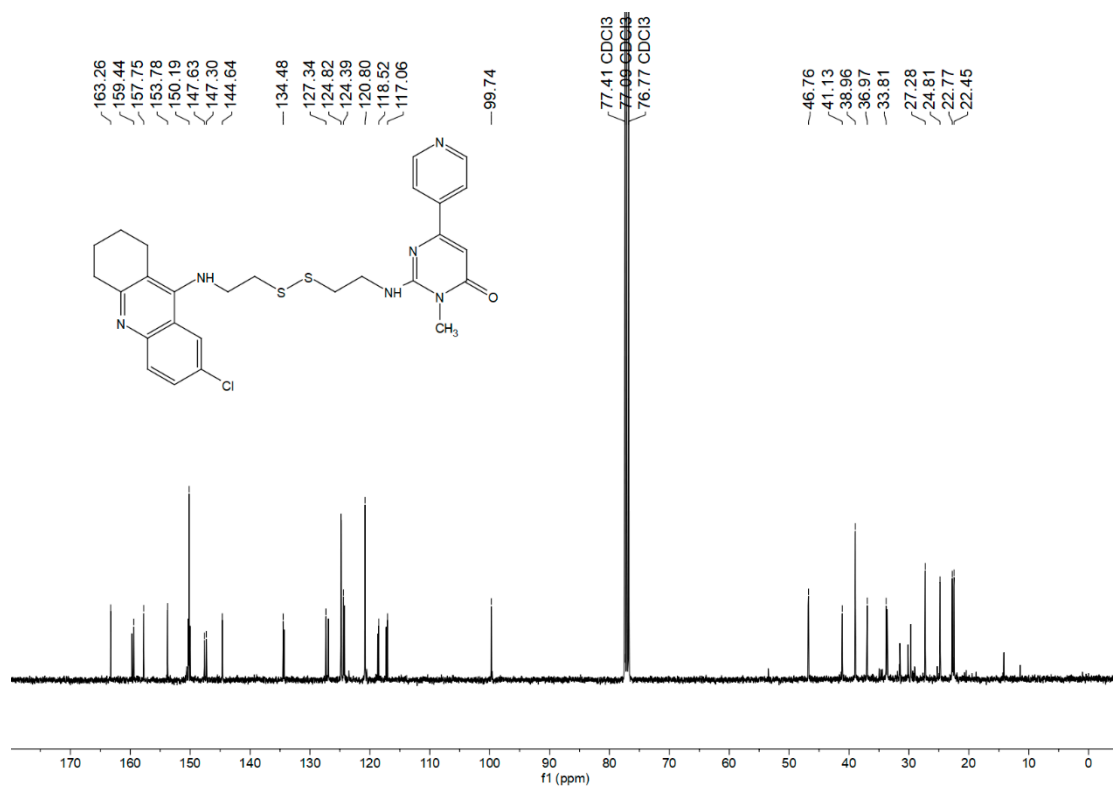

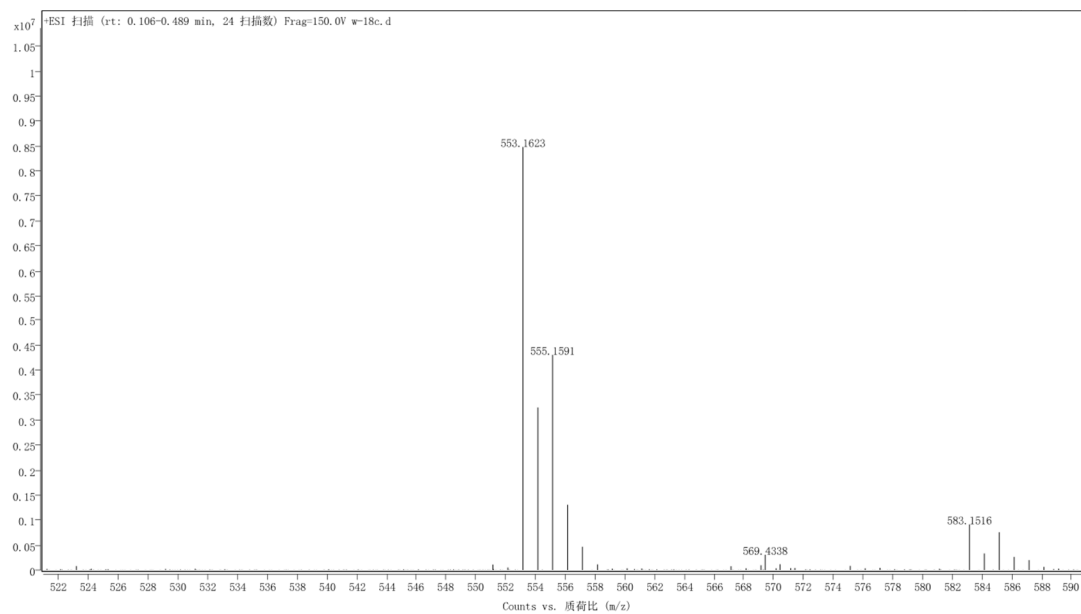

Supplement: s1 [file s1]
